# Supplementary material for: Single Step Laser-Induced Deposition of Plasmonic Au, Ag, Pt Mono-, Bi- and Tri-Metallic Nanoparticles
Source: MDPI journal article supplement (doi:10.3390/nano12010146), 2021-12-31
Supplement: s1 [file s1]

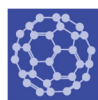

## Supplementary Information

# Single Step Laser-Induced Deposition of Plasmonic Au, Ag, Pt Mono-, Bi- and Tri-Metallic Nanoparticles

Daria V. Mamonova <sup>1</sup>, Anna A. Vasileva <sup>1</sup>, Yuri V. Petrov <sup>2</sup>, Alexandra V. Koroleva <sup>3</sup>, Denis V. Danilov <sup>4</sup>, Ilya E. Kolesnikov <sup>5</sup>, Gulia I. Bikbaeva <sup>1</sup>, Julien Bachmann <sup>1,6</sup> and Alina A. Manshina <sup>1,\*</sup>

<sup>1</sup> Institute of Chemistry, Saint-Petersburg State University, 26 Universitetskii Prospekt, Saint-Petersburg 198504, Russia; magwi@mail.ru (D.V.M.); anvsilv@gmail.com (A.A.V.); st086467@student.spbu.ru (G.I.B.); julien.bachmann@fau.de (J.B.)

<sup>2</sup> Department of Physics, Saint-Petersburg State University, Ulyanovskaya 3, Saint-Petersburg 198504, Russia; y.petrov@spbu.ru

<sup>3</sup> Center for Physical Methods of Surface Investigation, Research Park, Saint Petersburg University, Universitetskii Prospekt 35, Lit. A, Saint-Petersburg 198504, Russia; koroleva.alexandra.22@gmail.com

<sup>4</sup> Interdisciplinary Resource Center for Nanotechnology, Research Park, Saint-Petersburg State University, Ulyanovskaya 1, Saint-Petersburg 198504, Russia; danilov1denis@gmail.com

<sup>5</sup> Centre for Optical and Laser Materials Research, Research Park, Saint-Petersburg State University, Ulyanovskaya 5, Saint-Petersburg 198504, Russia; ilya.kolesnikov@spbu.ru

<sup>6</sup> Department of Chemistry and Pharmacy, Friedrich–Alexander University of Erlangen–Nürnberg, IZNF, Cauerstr. 3, 91058 Erlangen, Germany

\* Correspondence: a.manshina@spbu.ru

**Table S1.** Concentrations (mM) of metal precursors in solutions used for LID.

| Metal system | Solvent →                                                              | H <sub>2</sub> O  | CH <sub>3</sub> OH |
|--------------|------------------------------------------------------------------------|-------------------|--------------------|
|              | Precursor ↓                                                            | Concentration, mM |                    |
| Ag           | C <sub>7</sub> H <sub>5</sub> AgO <sub>2</sub>                         | 5.8               | —                  |
|              | CH <sub>3</sub> COOAg                                                  | —                 | 7.0                |
| Au           | H[AuCl <sub>4</sub> ]·nH <sub>2</sub> O                                | 11.6              | —                  |
|              | C <sub>6</sub> H <sub>9</sub> AuO <sub>6</sub>                         | —                 | 7.5                |
| Pt           | Pt(NH <sub>3</sub> ) <sub>4</sub> (OH) <sub>2</sub> ·xH <sub>2</sub> O | 5.3               | —                  |
| Ag-Au        | C <sub>7</sub> H <sub>5</sub> AgO <sub>2</sub>                         | 0.7               | —                  |
|              | +                                                                      |                   |                    |
|              | H[AuCl <sub>4</sub> ]·nH <sub>2</sub> O                                | 14.5              | —                  |
|              | CH <sub>3</sub> COOAg                                                  | —                 | 3.5                |
| Ag-Pt        | +                                                                      |                   |                    |
|              | C <sub>6</sub> H <sub>9</sub> AuO <sub>6</sub>                         | —                 | 3.7                |
|              | C <sub>7</sub> H <sub>5</sub> AgO <sub>2</sub>                         | 1.1               | —                  |
|              | +                                                                      |                   |                    |
| Au-Pt        | Pt(NH <sub>3</sub> ) <sub>4</sub> (OH) <sub>2</sub> ·xH <sub>2</sub> O | 2.2               | —                  |
|              | H[AuCl <sub>4</sub> ]·nH <sub>2</sub> O                                | 8.8               | —                  |
| Ag-Au-Pt     | +                                                                      |                   |                    |
|              | Pt(NH <sub>3</sub> ) <sub>4</sub> (OH) <sub>2</sub> ·xH <sub>2</sub> O | 0.6               | —                  |
|              | C <sub>7</sub> H <sub>5</sub> AgO <sub>2</sub>                         | 1.7               | —                  |
|              | +                                                                      |                   |                    |
|              | H[AuCl <sub>4</sub> ]·nH <sub>2</sub> O                                | 0.15              | —                  |
|              | +                                                                      |                   |                    |
|              | Pt(NH <sub>3</sub> ) <sub>4</sub> (OH) <sub>2</sub> ·xH <sub>2</sub> O | 1.0               | —                  |

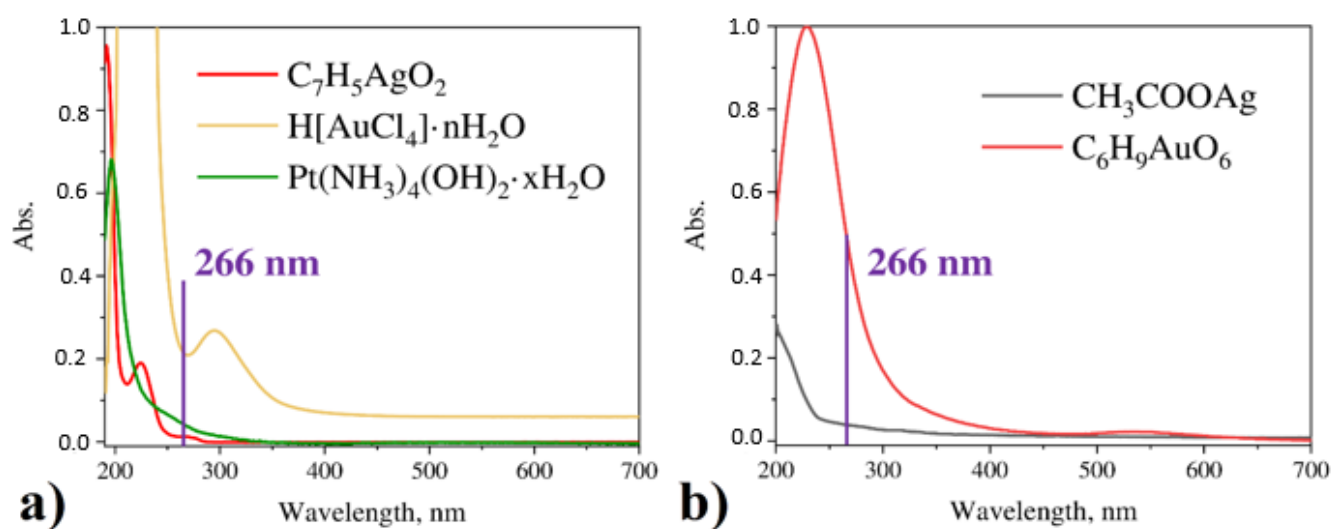

Figure S1. Absorption spectra of complexes solutions (a) in water and (b) in methanol.

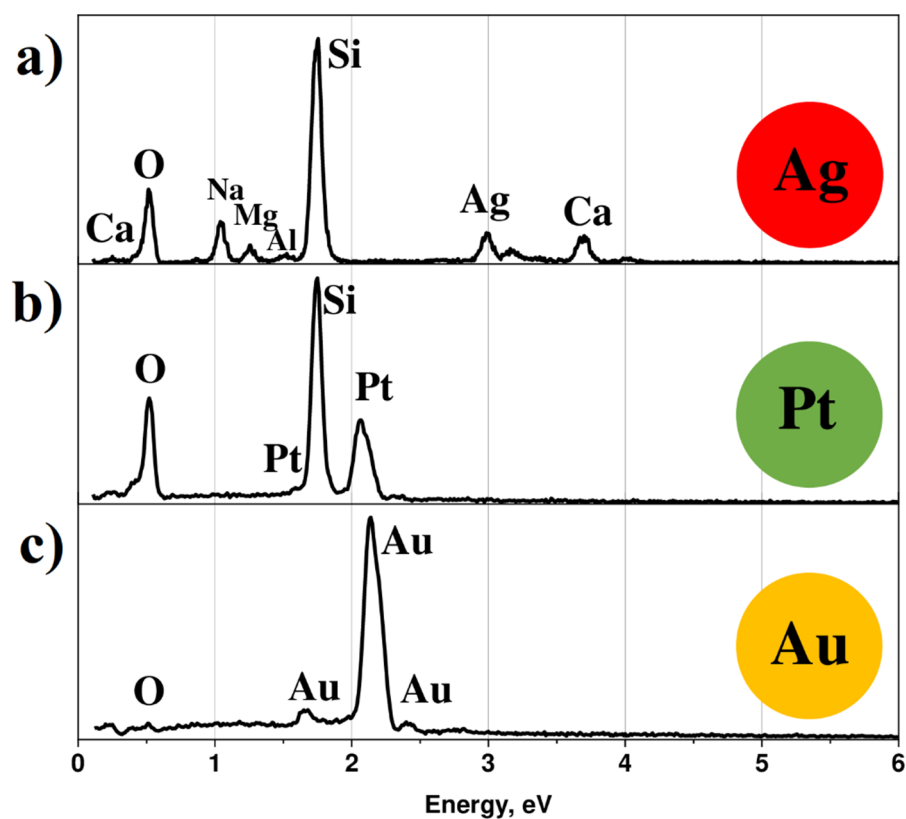

Figure S2. EDX spectrum for single NPs systems from water solutions: (a)  $C_7H_5AgO_2$ ; (b)  $Pt(NH_3)_4(OH)_2 \cdot xH_2O$ ; (c)  $H[AuCl_4] \cdot nH_2O$ .

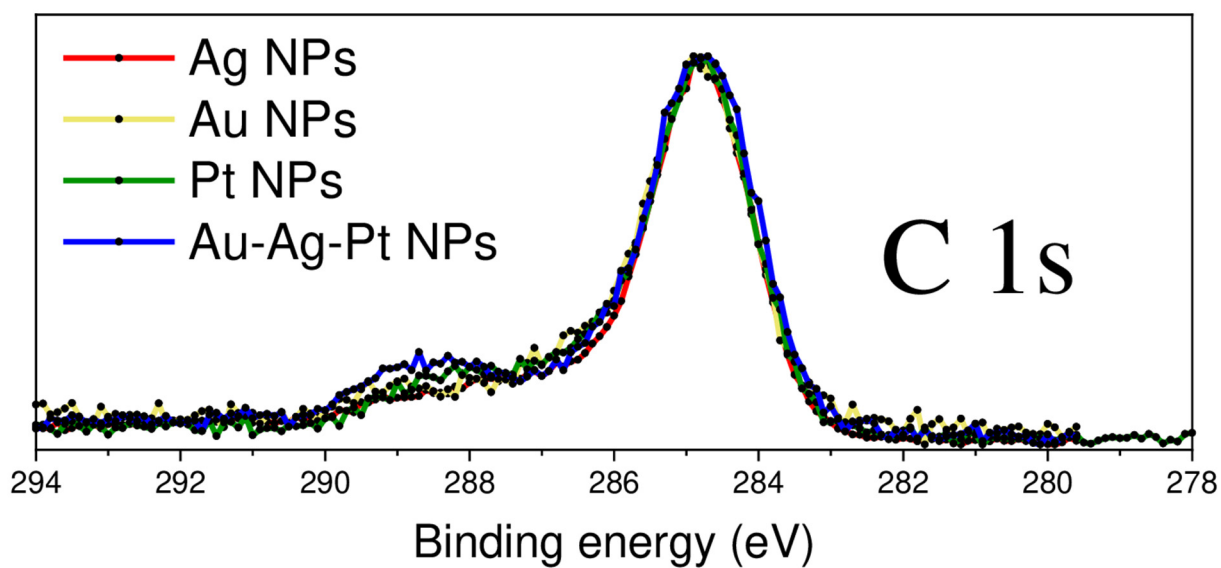

**Figure S3.** C1s XPS spectra for single (Pt, Ag and Au) and triple (Pt-Ag-Au) systems from water solutions  $C_7H_5AgO_2 + Pt(NH_3)_4(OH)_2 \cdot xH_2O + H[AuCl_4] \cdot nH_2O$  in  $H_2O$ .

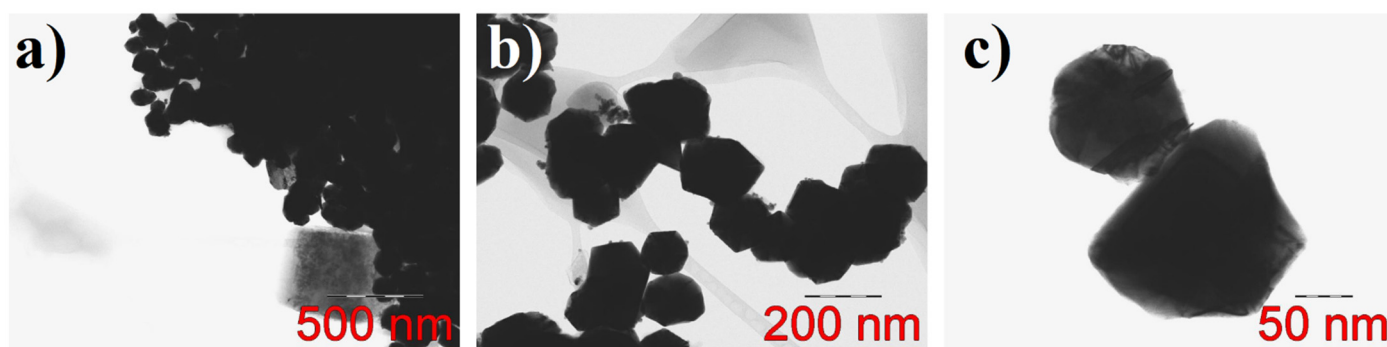

**Figure S4.** STEM images with different resolutions (a–c) for monometallic Au particles.

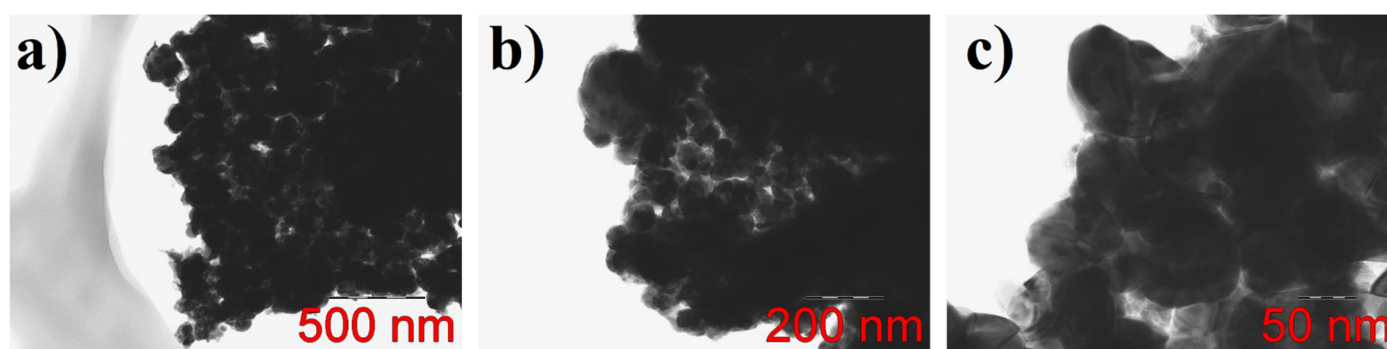

**Figure S5.** STEM images with different resolutions (a–c) for monometallic Ag particles.

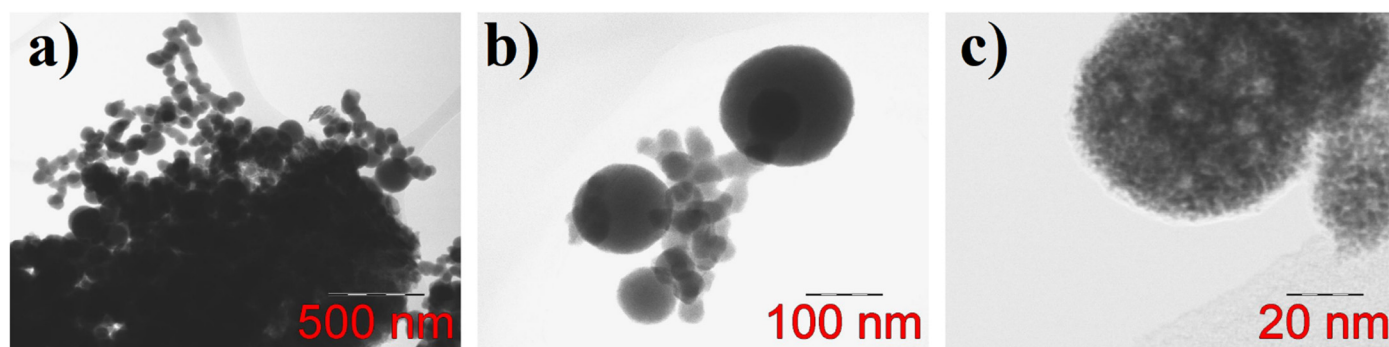

**Figure S6.** STEM images with different resolutions (a–c) for monometallic Pt particles.
